# Supplementary material
Source: publisher figshare collection journal article supplement (https://sage.figshare.com/ndownloader/files/18080264)
Supplement: Supplementary file 1 [file 18080264]

**Supplemental Table. 1** The Quality Assessment Base on Newcastle – Ottawa Quality Assessment Scale (NOS).

[illegible]

Supplemental Table. 1 (Continued)

|               |                                                                    |                                                                                                                                                                   |   |   |   |   |   |   |   |   |   |   |   |
|---------------|--------------------------------------------------------------------|-------------------------------------------------------------------------------------------------------------------------------------------------------------------|---|---|---|---|---|---|---|---|---|---|---|
| Comparability | 1) Comparability of cohorts on the basis of the design or analysis | a) study controls for _____ (select the most important factor) ✱                                                                                                  |   | ✱ | ✱ |   | ✱ |   | ✱ | ✱ | ✱ |   |   |
|               |                                                                    | b) study controls for any additional factor ✱                                                                                                                     | ✱ | ✱ | ✱ |   | ✱ |   | ✱ | ✱ | ✱ | ✱ |   |
| Outcome       | 1) Assessment of outcome                                           | a) independent blind assessment ✱                                                                                                                                 |   |   |   |   |   |   |   |   |   |   |   |
|               |                                                                    | b) record linkage ✱                                                                                                                                               | ✱ | ✱ | ✱ | ✱ | ✱ | ✱ | ✱ | ✱ | ✱ | ✱ |   |
|               |                                                                    | c) self report                                                                                                                                                    |   |   |   |   |   |   |   |   |   |   |   |
|               |                                                                    | d) no description                                                                                                                                                 |   |   |   |   |   |   |   |   |   |   |   |
|               | 2) Was follow-up long enough for outcomes to occur                 | a) yes (select an adequate follow up period for outcome of interest) ✱                                                                                            | ✱ | ✱ | ✱ | ✱ | ✱ | ✱ | ✱ | ✱ | ✱ | ✱ |   |
|               |                                                                    | b) no                                                                                                                                                             |   |   |   |   |   |   |   |   |   |   |   |
|               | 3) Adequacy of follow up of cohorts                                | a) complete follow up - all subjects accounted for ✱                                                                                                              |   |   | ✱ | ✱ |   | ✱ |   | ✱ |   |   |   |
|               |                                                                    | b) subjects lost to follow up unlikely to introduce bias - small number lost - >____ % (select an adequate %) follow up, or description provided of those lost) ✱ | ✱ | ✱ |   |   | ✱ | ✱ |   | ✱ |   | ✱ |   |
|               |                                                                    | c) follow up rate < ____% (select an adequate %) and no description of those lost                                                                                 |   |   |   |   |   |   |   |   |   |   |   |
|               |                                                                    | d) no statement                                                                                                                                                   |   |   |   |   |   |   |   |   |   |   |   |
| Total score   |                                                                    |                                                                                                                                                                   | 7 | 9 | 9 | 7 | 9 | 6 | 8 | 9 | 9 | 9 | 8 |
